# Supplementary material
Source: PubMed Central journal article supplement (PMC3474324)
Supplement: NIHMS408753-supplement-Supplemental_figure_S2.pdf [file NIHMS408753-supplement-Supplemental_figure_S2.pdf]

## Supplemental Tables

**SUPPLEMENTAL TABLE I.** Small Intestinal RNA production in B6 and B6.*mdr1a*<sup>-/-</sup>

|                                |                                 | Non-<br>Irradiated | LPS              | LPS<br>Irradiated    |
|--------------------------------|---------------------------------|--------------------|------------------|----------------------|
| <b>IL-1<math>\alpha</math></b> | B6                              | 1                  | 1.68 (0.41-6.87) | *§15.55 (6.45-37.46) |
|                                | B6. <i>mdr1a</i> <sup>-/-</sup> | 1                  | 0.45 (0.11-1.82) | 0.65 (0.18-2.41)     |
| <b>IL-10</b>                   | B6                              | 1                  | 1.14 (0.2-6.46)  | *0.1 (0.06-0.17)     |
|                                | B6. <i>mdr1a</i> <sup>-/-</sup> | 1                  | 0.82 (0.31-2.16) | *0.12 (0.04-0.35)    |
| <b>IL-1<math>\beta</math></b>  | B6                              | 1                  | 0.37 (0.09-1.57) | 0.58 (0.35-0.96)     |
|                                | B6. <i>mdr1a</i> <sup>-/-</sup> | 1                  | 0.48 (0.09-2.49) | *0.12 (0.04-0.35)    |
| <b>IFN-<math>\gamma</math></b> | B6                              | 1                  | 1.02 (0.26-4.02) | §0.61 (0.3-1.23)     |
|                                | B6. <i>mdr1a</i> <sup>-/-</sup> | 1                  | 0.83 (4.07-0.17) | *0.03 (0.1-0.01)     |

animals

\*Indicates statistical significance of P<.05 as determined by the Students T-test when compared to baseline gene expression in each strain

§ Indicates statistical significance of p=.05 between P-gp deficient and control animals as determined by Student's T-Test
