# Supplementary material
Source: PubMed Central journal article supplement (PMC3474324)

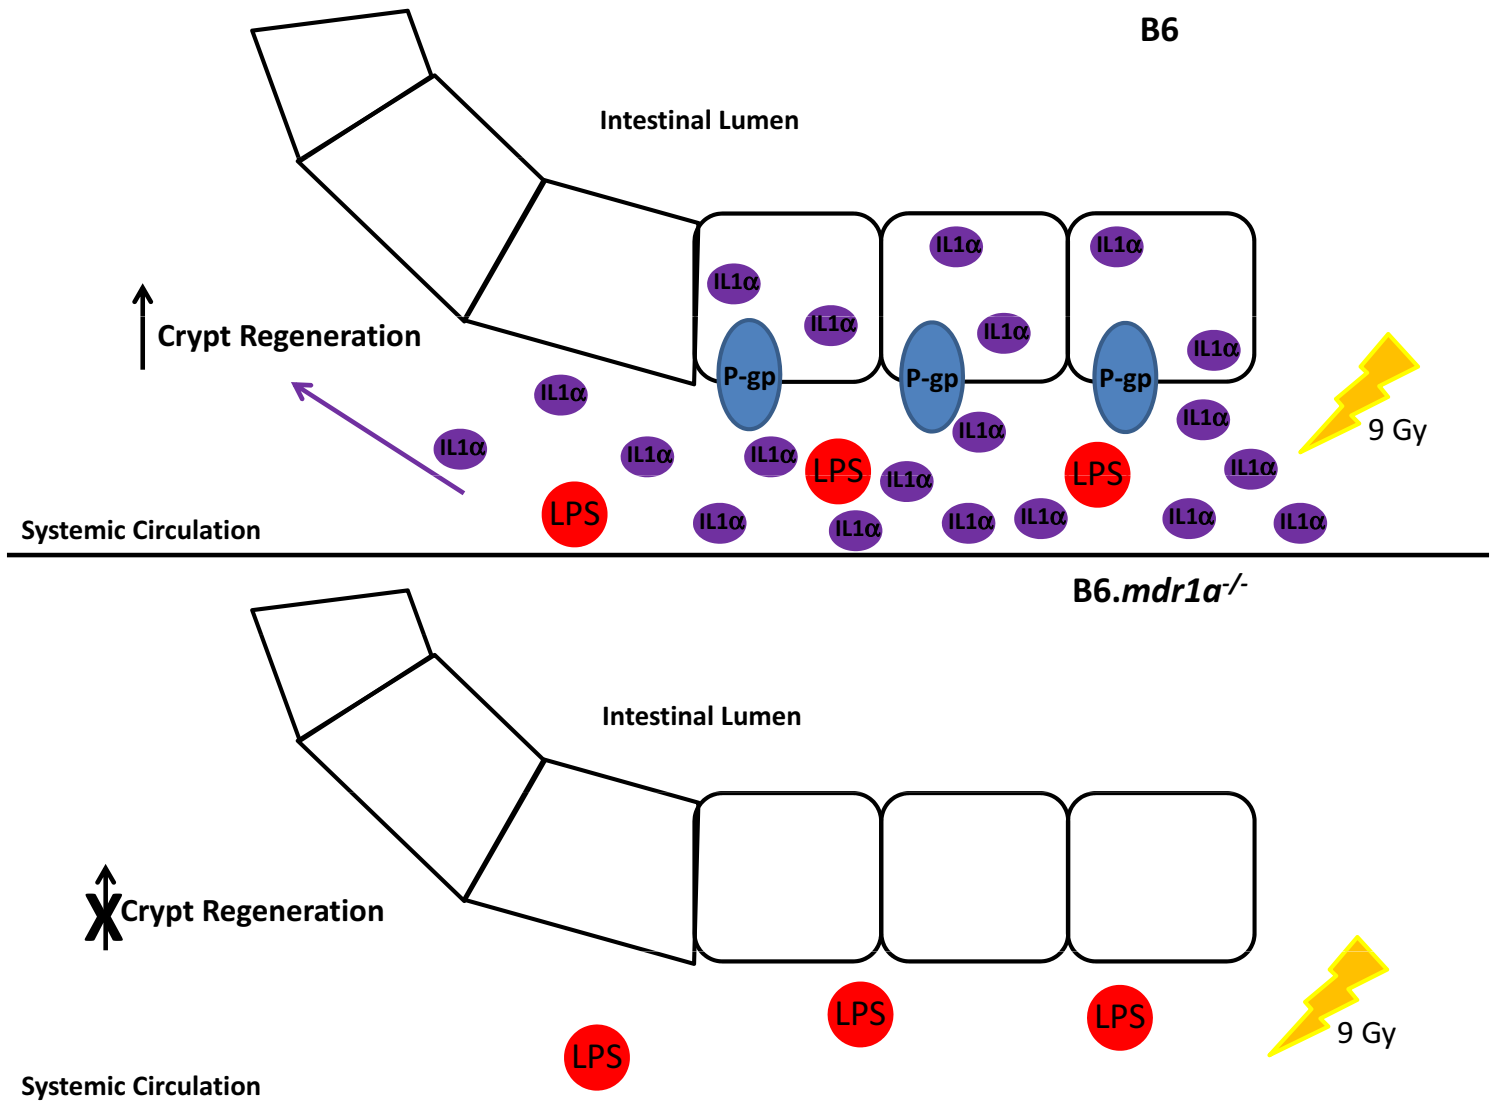

Supplement: NIHMS408753-supplement-Supplemental_figure_S1.pdf [file NIHMS408753-supplement-Supplemental_figure_S1.pdf]
